# Supplementary material
Source: PubMed Central journal article supplement (PMC7315224)
Supplement: NIHMS1598791-supplement-1.pdf [file NIHMS1598791-supplement-1.pdf]

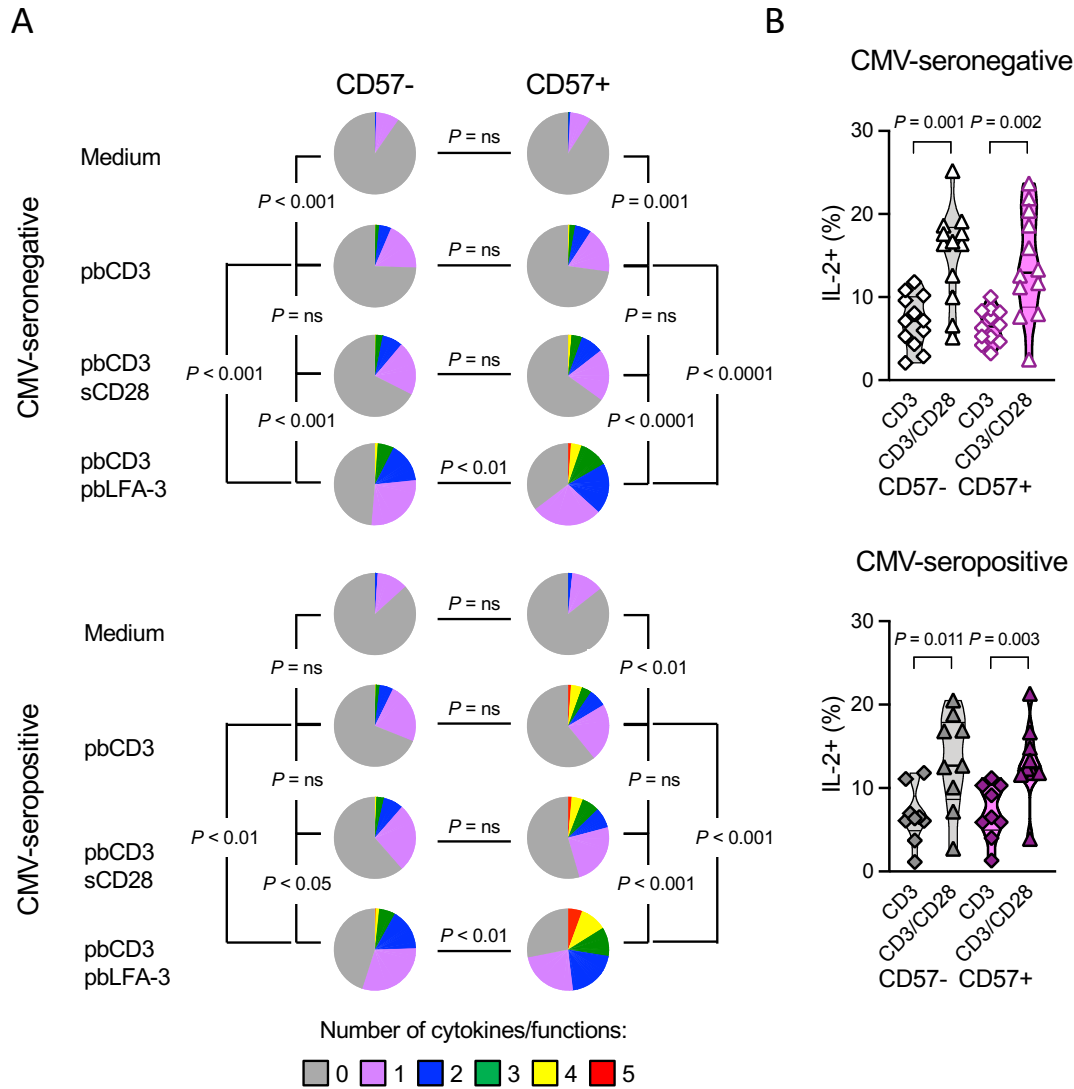

**Figure S1.** CD28 costimulation enhances CD57- and CD57+ CD4 Tmem functionality. **(A)** Cumulative cytokine/functions (IFN $\gamma$ , TNF, IL-2, MIP-1 $\beta$ , and/or CD107a) by CD57- (gray) and CD57+ (purple) CD4 Tmem from CMV-seronegative (n = 12, *top*) and CMV-seropositive (n = 9, *bottom*) donors after 6h stimulation with medium control; plate-bound anti-CD3 (pbCD3), pbCD3 with soluble anti-CD28 (pbCD3/sCD28); or pbCD3 with plate-bound LFA-3 (pbCD3/pbLFA-3). Significance determined by pie comparisons using SPICE software, with 10,000 permutations per comparison. **(B)** Percentage of CD57- and CD57+ CD4 Tmem in each donor group that produce IL-2 after pbCD3 (CD3) or pbCD3sCD28 (CD3/CD28) stimulation. Significance determined by Mann-Whitney test.

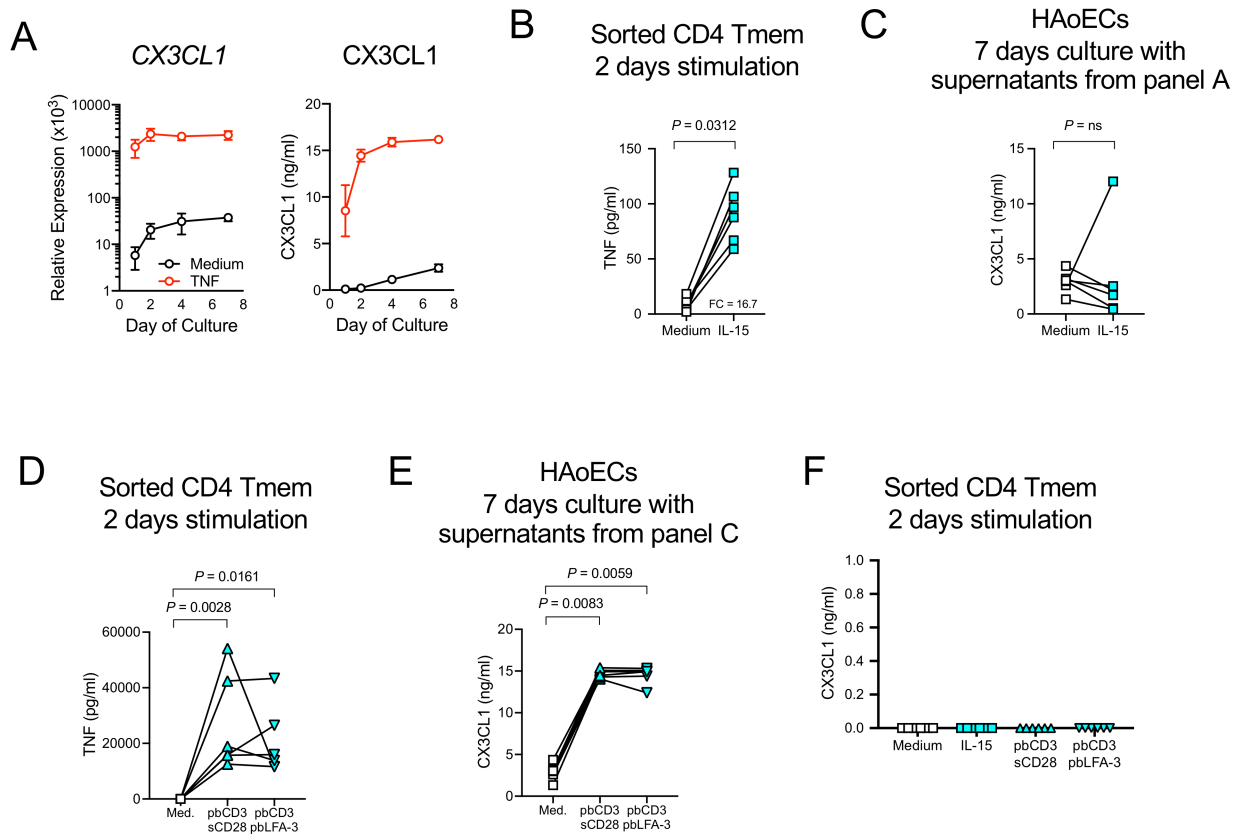

**Figure S2.** CD4 T cell-derived TNF induces CX3CL1 production from HAoECs. **(A)** (Left) Relative CX3CL1 expression compared to GAPDH and (Right) CX3CL1 secretion in primary human aortic endothelial cells ( $n = 3$ ) stimulated with medium control (black) or recombinant TNF (red). **(B)** Amount of TNF in culture supernatants by magnetic bead-enriched CD4 Tmem following 2 days of stimulation with IL-15 or medium control. Significance determined by Wilcoxon signed rank test. **(C)** Amount of CX3CL1 in culture supernatants of human aortic endothelial cells (HAoECs) following 7 days of stimulation with a 1:2 dilution of culture supernatants from Panel B. Significance determined by Wilcoxon signed rank test. **(D)** Amount of TNF in culture supernatants by magnetic bead-enriched CD4 Tmem following 2 days of stimulation with pbCD3 with medium control, soluble anti-CD28 (pbCD3/sCD28), or pbCD3 with plate-bound LFA-3 (pbCD3/pbLFA-3). Significance determined by Kruskal-Wallis test with Dunn's correction for multiple comparisons. **(E)** Amount of CX3CL1 in culture supernatants of human aortic endothelial cells (HAoECs) following 7 days of stimulation with a 1:2 dilution of culture supernatants from Panel D. Significance determined by Kruskal-Wallis test with Dunn's correction for multiple comparisons. **(F)** Amount of CX3CL1 in culture supernatants by magnetic bead-enriched CD4 Tmem following indicated stimulations.

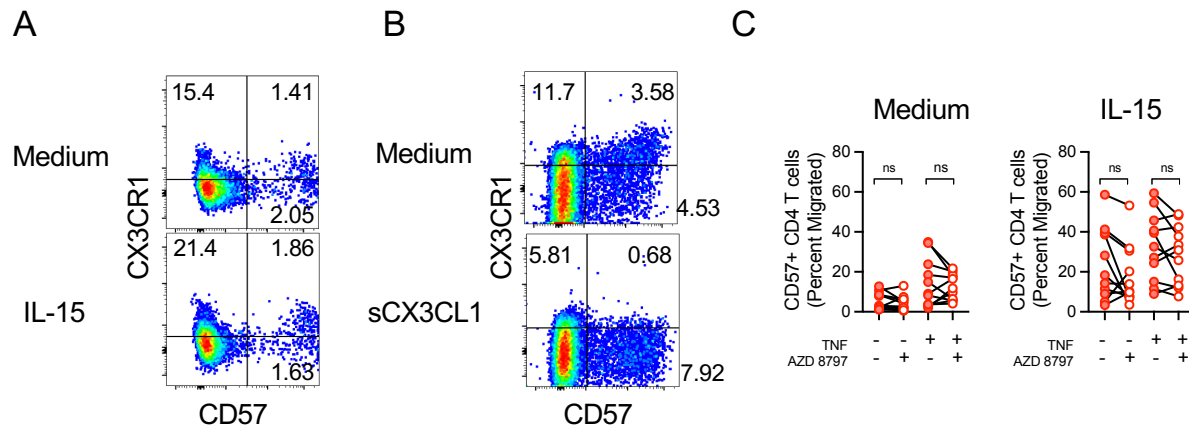

**Figure S3.** CX3CR1 expression and CD57+ CD4 Tmem migration. **(A)** Representative dotplots (n = 11) showing CX3CR1 and CD57 expression on CD4 Tmem after 2 days of stimulation with medium control or IL-15, prior to use in transwell assay. **(B)** Representative dotplots (n = 4) showing surface expression of CX3CR1 and CD57 on CD4 Tmem following overnight exposure to CX3CL1 or medium control. **(C)** Absolute number of CD57+ CD4 Tmem in the lower chamber expressed as a percent of total (upper chamber + lower chamber) CD57+ CD4 Tmem ("Percent migrated") pre-treated with medium control (*left*) or IL-15 (*right*). Significance was determined by Wilcoxon signed rank test.
